# Supplementary material for: An Extract from the Plant Deschampsia antarctica Protects Fibroblasts from Senescence Induced by Hydrogen Peroxide
Source: Hindawi journal article supplement (doi:10.1155/2017/2694945), 2017-01-01
Supplement: f1 [file 2694945.f1.pdf]

# FIGURE S1

- *Day of week:*

MONDAY

TUESDAY

WEDNESDAY

THURSDAY

- *Confluency:*

30%

50%

70%

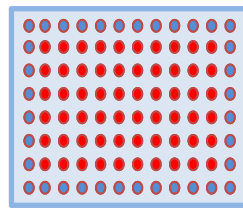

96 Well-plates

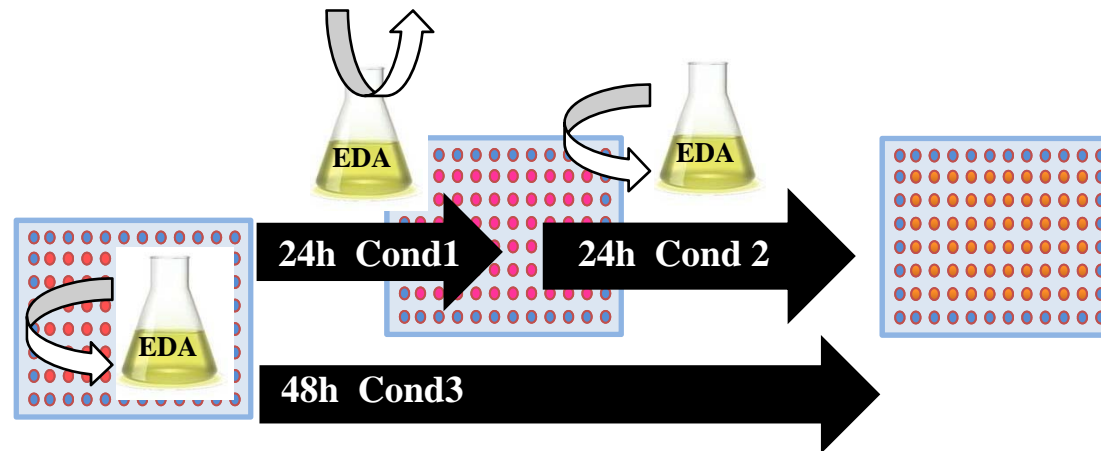

- *Procedure:*

Seeding cells  
( $3,5 \times 10^3$  cells/well)

(1)

EDA Treatment:  
Cond1  
&  
Cond3

(2)

EDA Treatment:  
Cond2

(3)

Proliferation and  
senescence assays

(4)

# FIGURE S2

▪ *Day of week:*

MONDAY

TUESDAY

WEDNESDAY

THURSDAY

▪ *Confluency:*

50%

70%

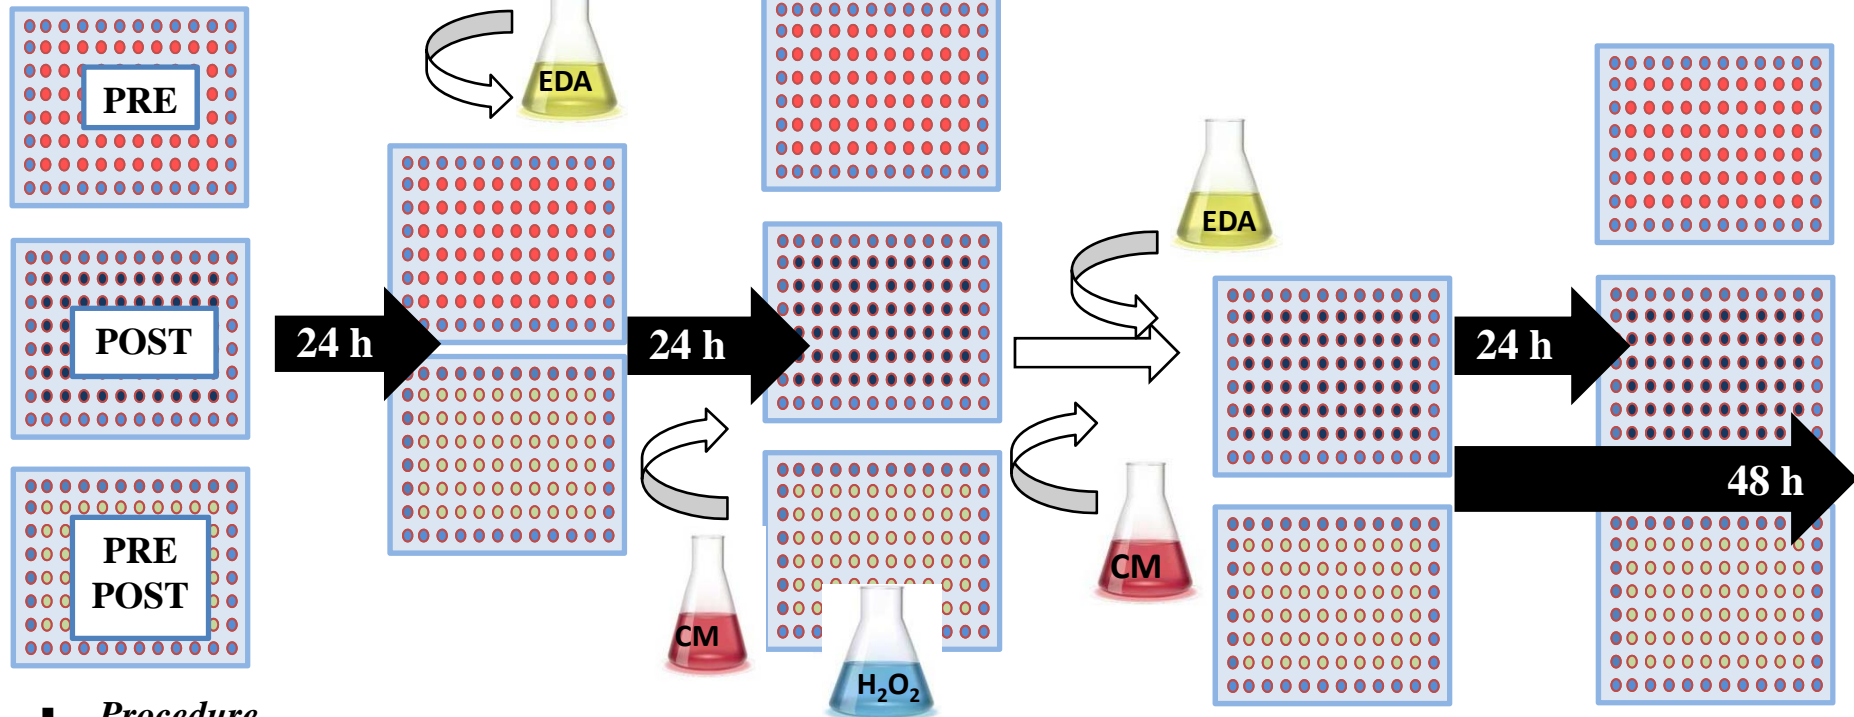

▪ *Procedure*

Seeding cells  
( $3,5 \times 10^3$  cells/well)

Treatment:  
EDA PRE  
&  
PRE-POST

Treatment  
 $200 \mu\text{M H}_2\text{O}_2$  2 h  
PBS washing and addition  
complete medium (CM)

Treatment:  
EDA POST  
&  
PRE-POST

Measurement of  
different  
parameters

(1)

(2)

(3)

(4)

(5)
